# Supplementary material
Source: PubMed Central journal article supplement (PMC3774565)
Supplement: figS1.pdf [file figS1.pdf]

**A. Networks of 4 h exposure (400  $\mu$ M Cu)**

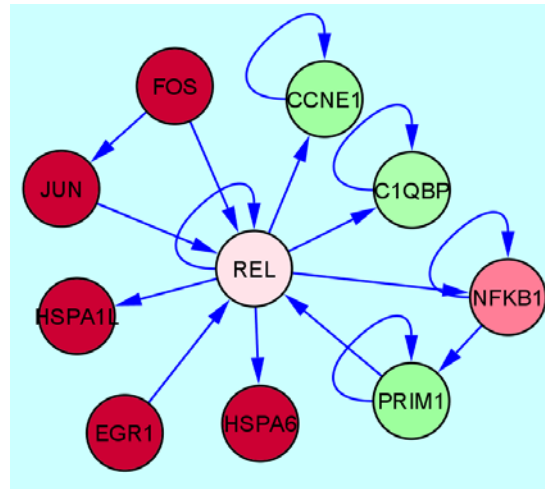

**REL module  
Network 6**

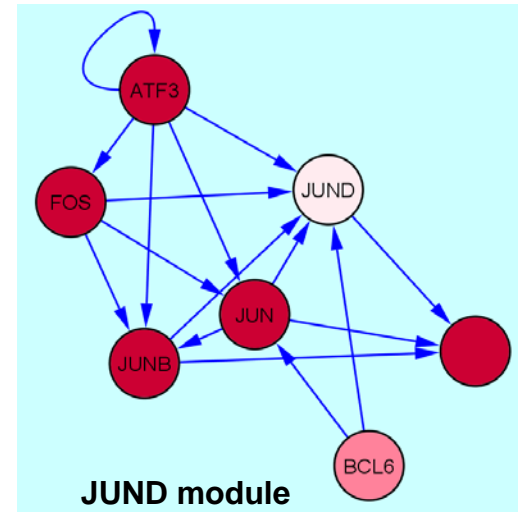

**JUND module  
Network 8**

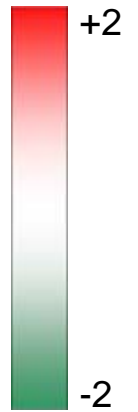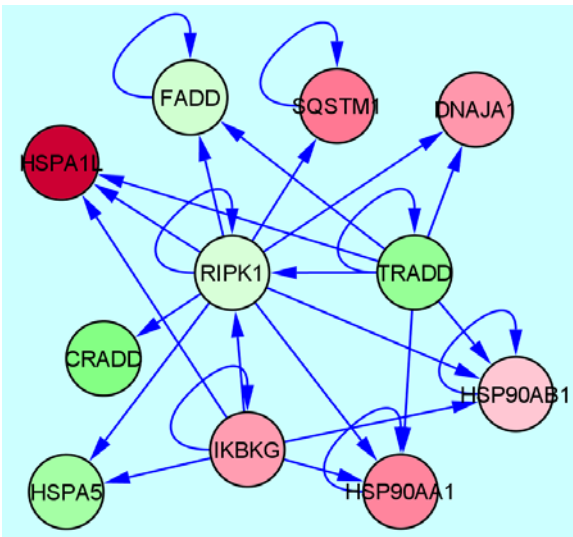

**RIPK1 module  
Network 9**

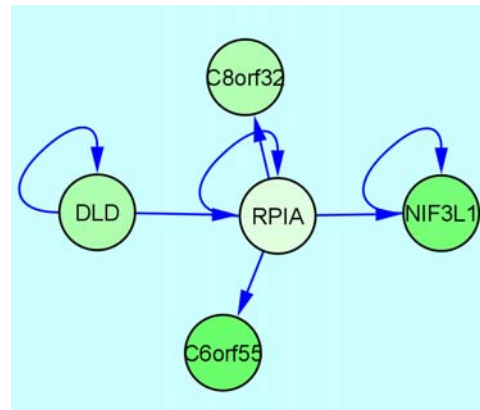

**RPIA module  
Network 13**

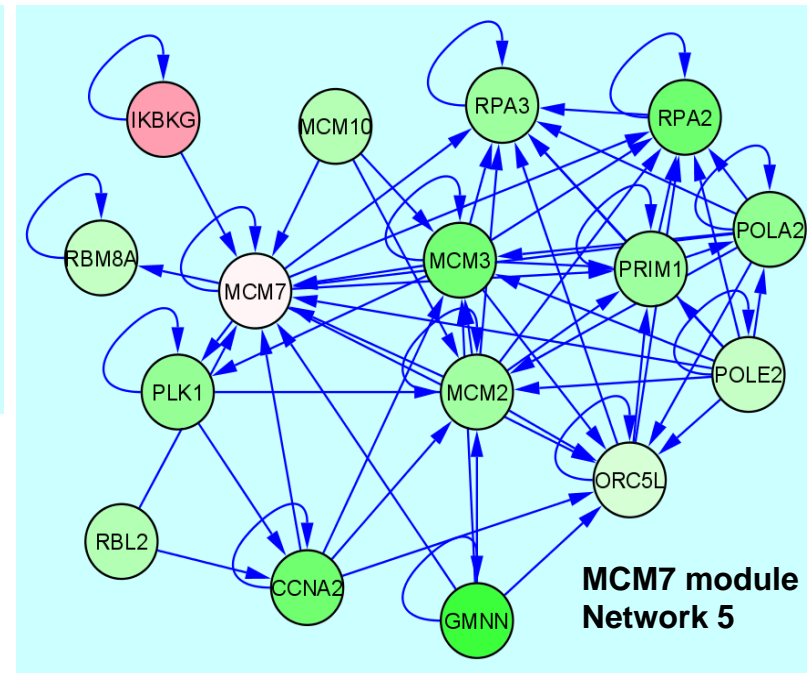

**MCM7 module  
Network 5**

## B. Networks of 8 h exposure (400 $\mu$ M Cu)

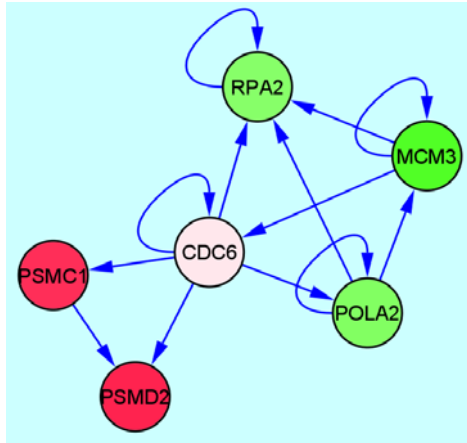

**CDC6 module**  
**Network 4**

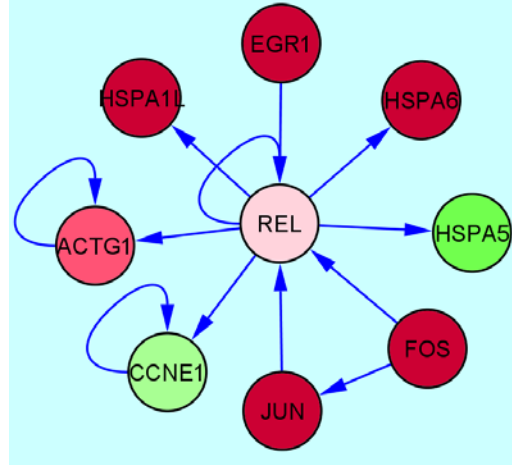

**REL module**  
**Network 5**

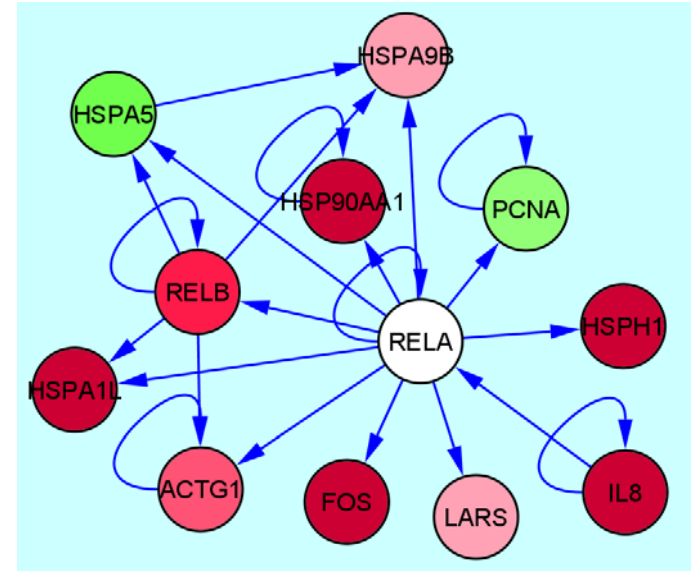

**RELA module**  
**Network 6**

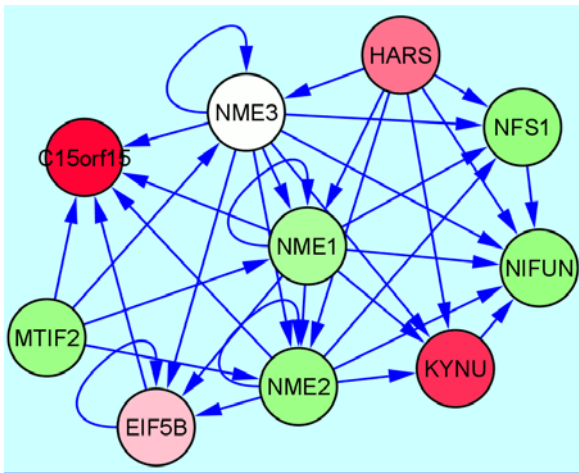

**NME3 module**  
**Network 11**

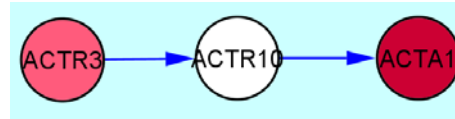

**ACTR10 module**  
**Network 7**

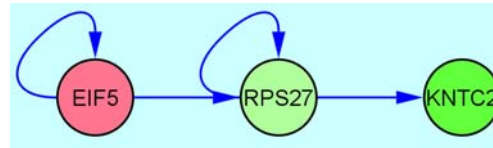

**RPS27 module**  
**Network 9**

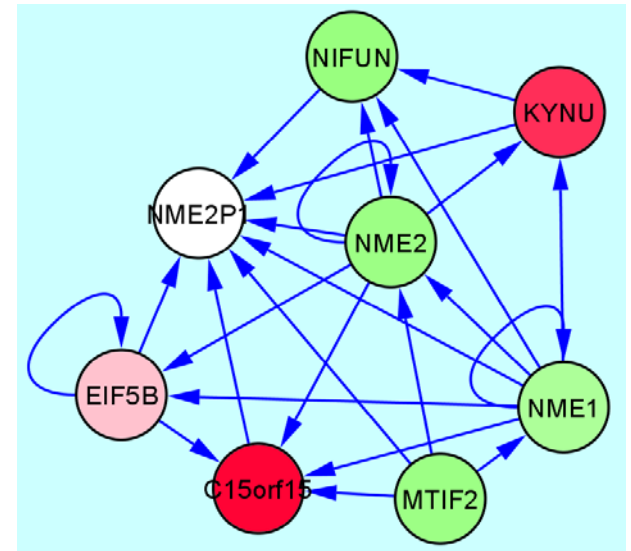

**NME2P1 module**  
**Network 12**

## B. Networks of 8 h exposure (400 $\mu$ M Cu) (cont.)

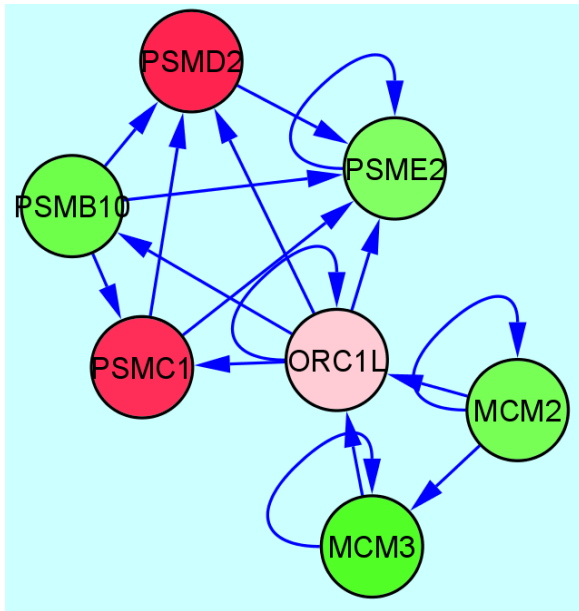

**ORC1L module  
Network 13**

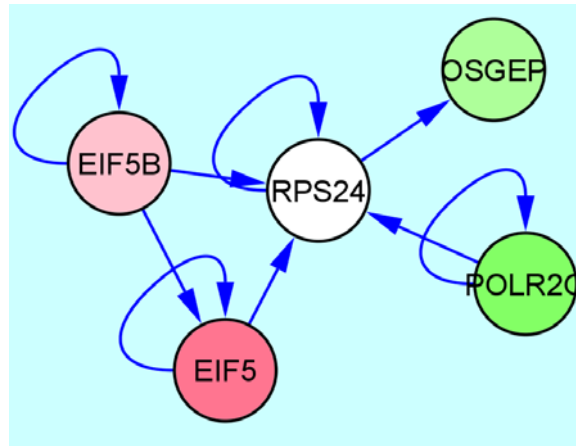

**RPS24 module  
Network 14**

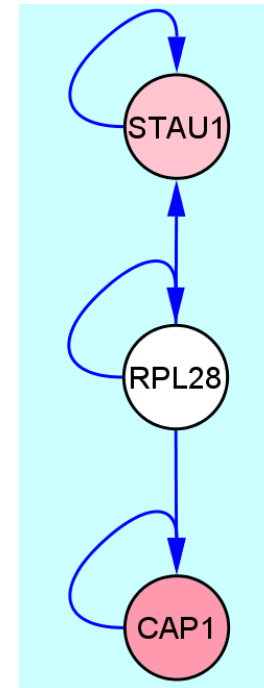

**RPL28 module  
Network 15**

### C. Networks of 12 h exposure (400 μM Cu)

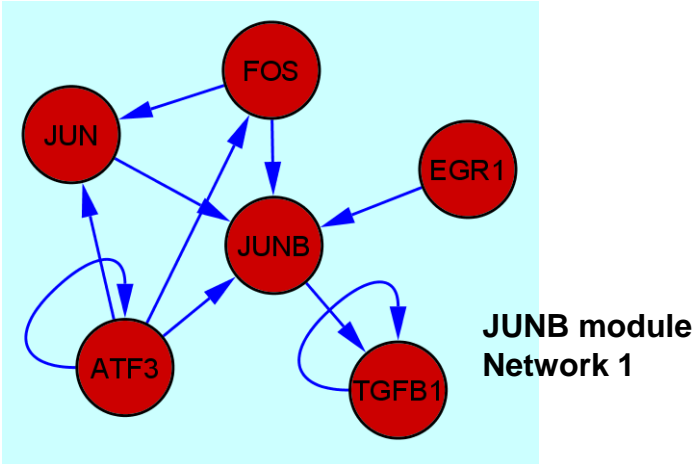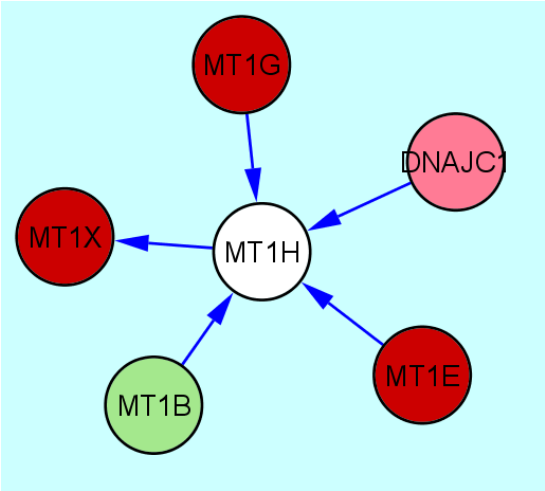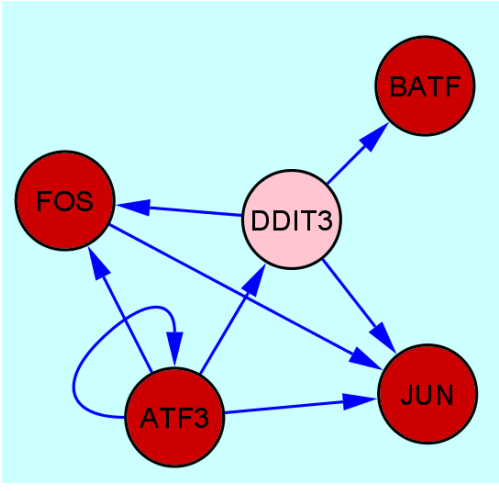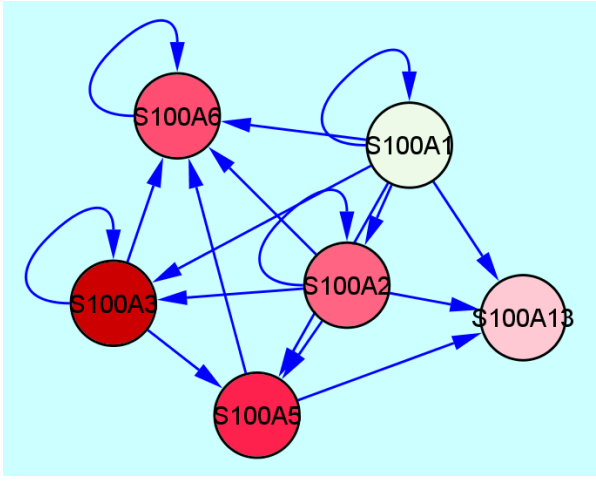

MT1H module  
Network 2

DDIT3 module  
Network 3

S100A5 module  
Network 4

**C. Networks of 12 h exposure (400  $\mu$ M Cu) (cont.)**

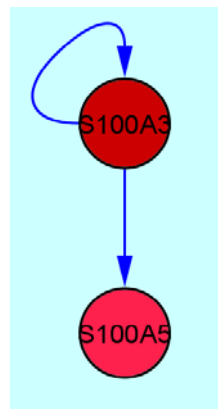

**S100A3 module Network 6**

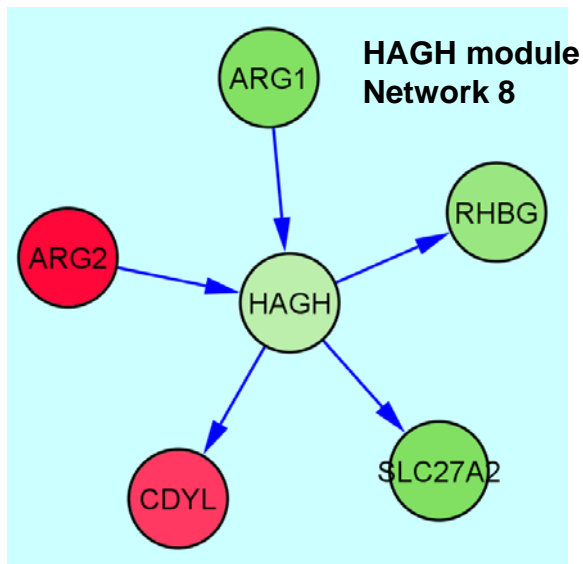

**HAGH module Network 8**

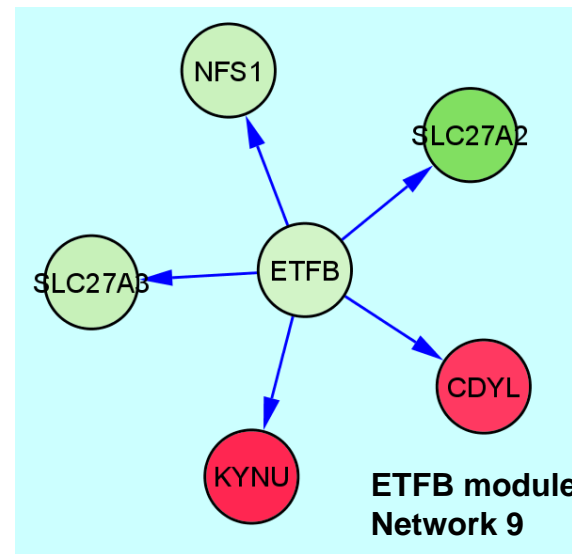

**ETFB module Network 9**

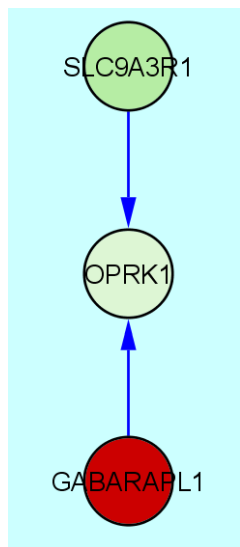

**OPRK1 module Network 11**

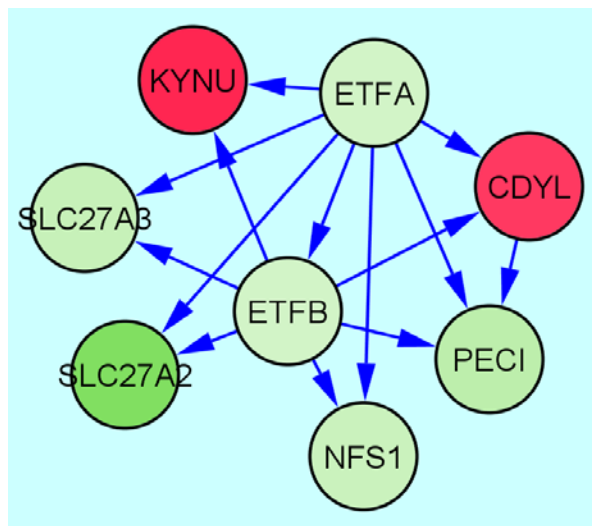

**ETFA module Network 10**

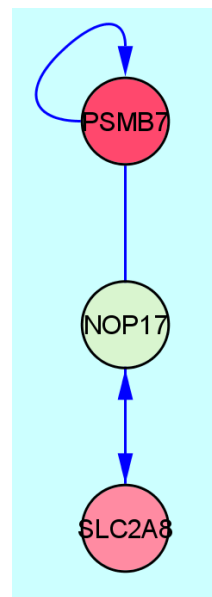

**SLC2A8 module Network 12**

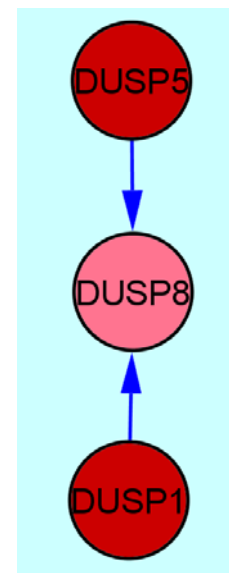

**DUSP8 module Network 13**

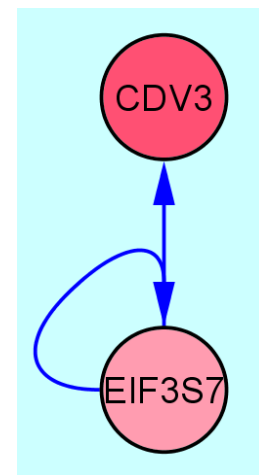

**CDV3 module Network 15**

## D. Networks of 24 h exposure (400 $\mu$ M Cu)

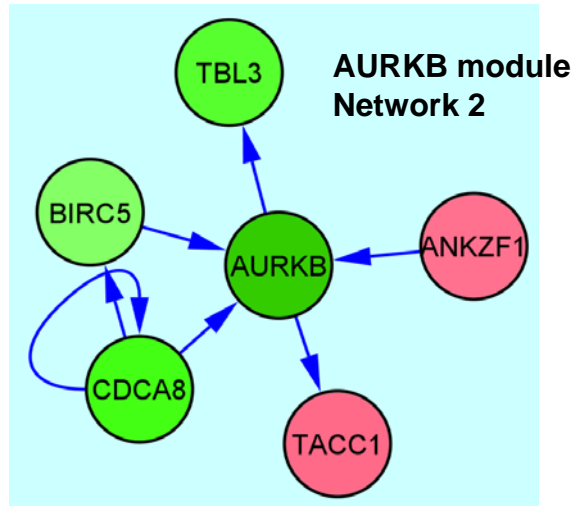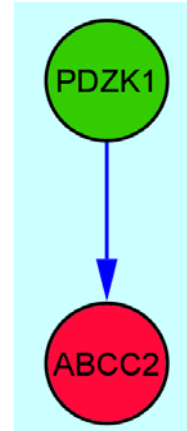

ABCC2 module Network 4

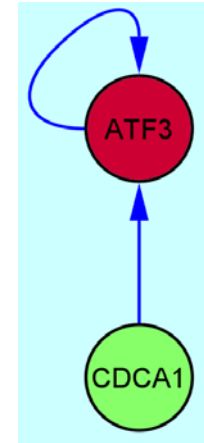

CDCA1 module Network 6

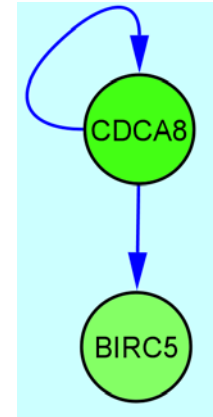

CDCA8 module Network 8

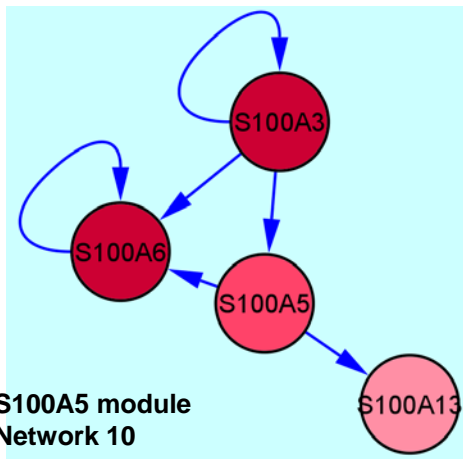

S100A5 module Network 10

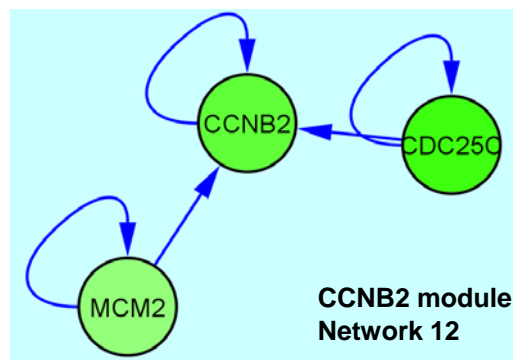

CCNB2 module Network 12

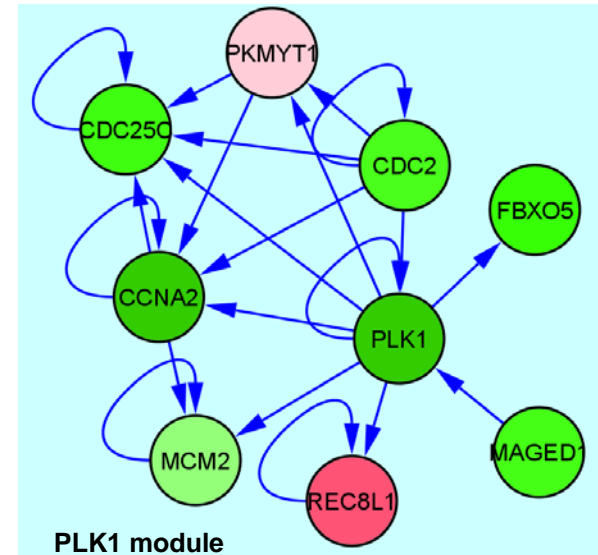

PLK1 module Network 13
